# Supplementary material
Source: Springer Nature journal article supplement (https://www.springermedizin.de/resource/supplementary/12943_2013_1237_MOESM2_ESM.pdf/9552808)
Supplement: MOESM2 [file 9552808]

## Supplement Figure S1)

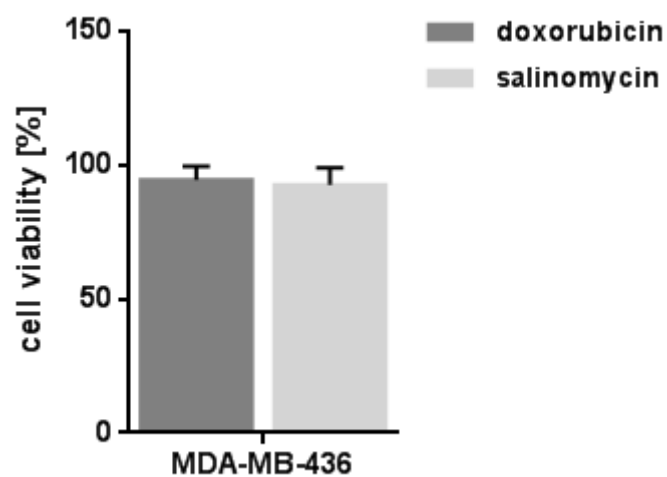

Cell viability upon doxorubicin or salinomycin treatment. MDA-MB-436 cells were treated for 72h with 0.05 $\mu$ M doxorubicin or 0.05 $\mu$ M salinomycin. Cell viability was determined by a CellTiter Glo assay and normalized to mock-treated control cells.
